# Supplementary material for: Accurate Measurement of the Effects of All Amino-Acid Mutations on Influenza Hemagglutinin
Source: PubMed Central journal article supplement (PMC4926175; doi:10.3390/v8060155), 2016-06-03
Supplement: viruses-08-00155-s001.pdf [file viruses-08-00155-s001.pdf]

# Supplementary Materials: Accurate Measurement of the Effects of All Amino-Acid Mutations on Influenza Hemagglutinin

Michael B. Doud and Jesse D. Bloom

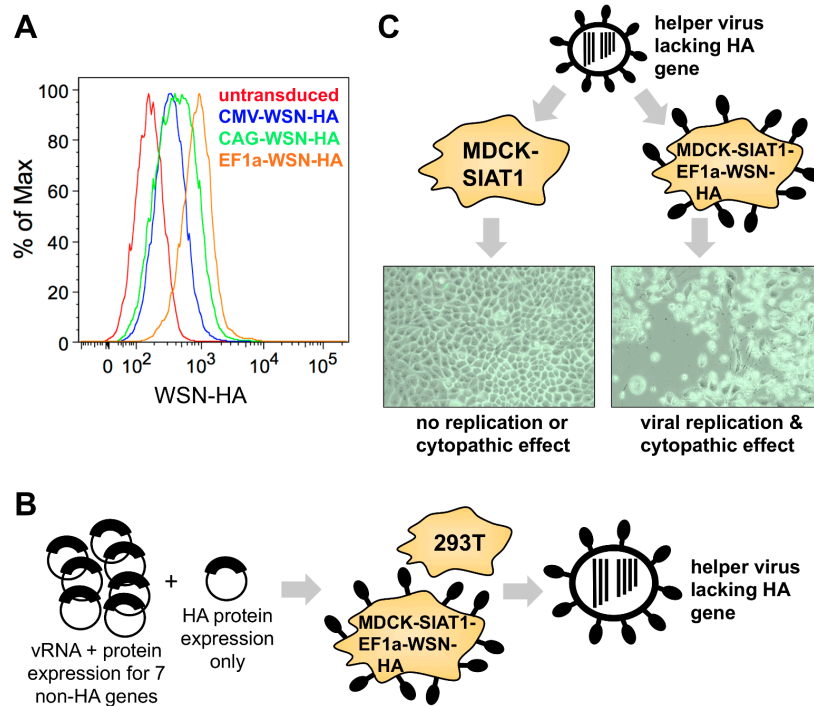

**Figure S1.** An HA-deficient helper virus can replicate in cells constitutively expressing HA protein.

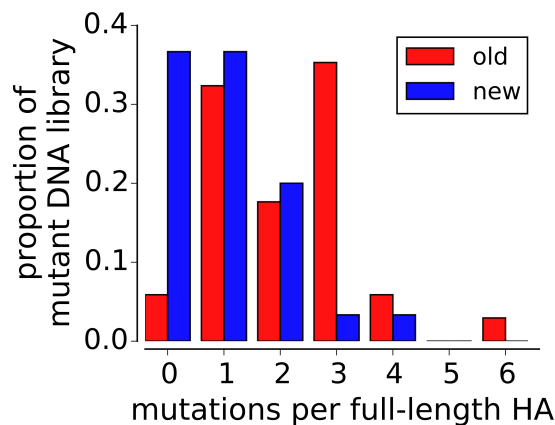

**Figure S2.** The mutant plasmid DNA library used in this study (“new”) has a lower mutation rate than the library used by [4] (“old”).

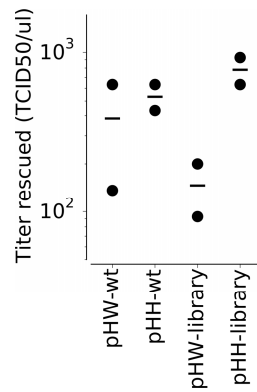

**Figure S3.** Mutant virus library generation is more efficient when HA is encoded on the pHH21 plasmid.

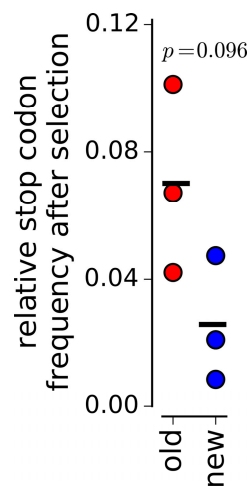

**Figure S4.** Purging of stop codons is more complete in our new experiment than in the previous one.

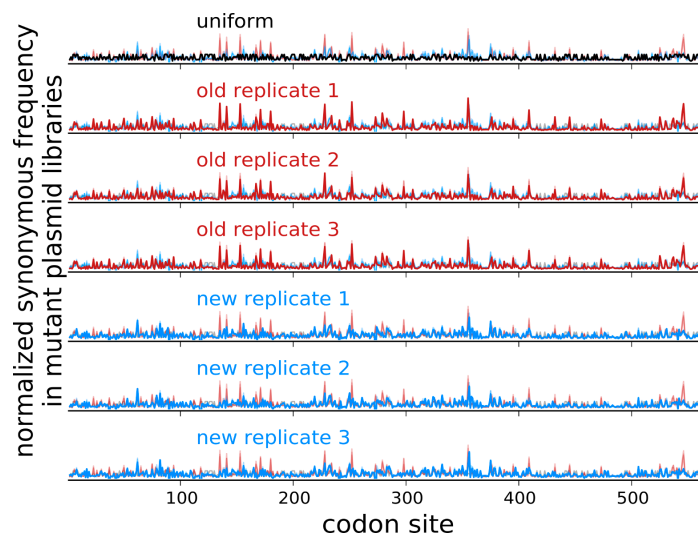

**Figure S5.** Synonymous frequency peaks observed in bottlenecked virus libraries are not due to the composition of plasmid mutant libraries.

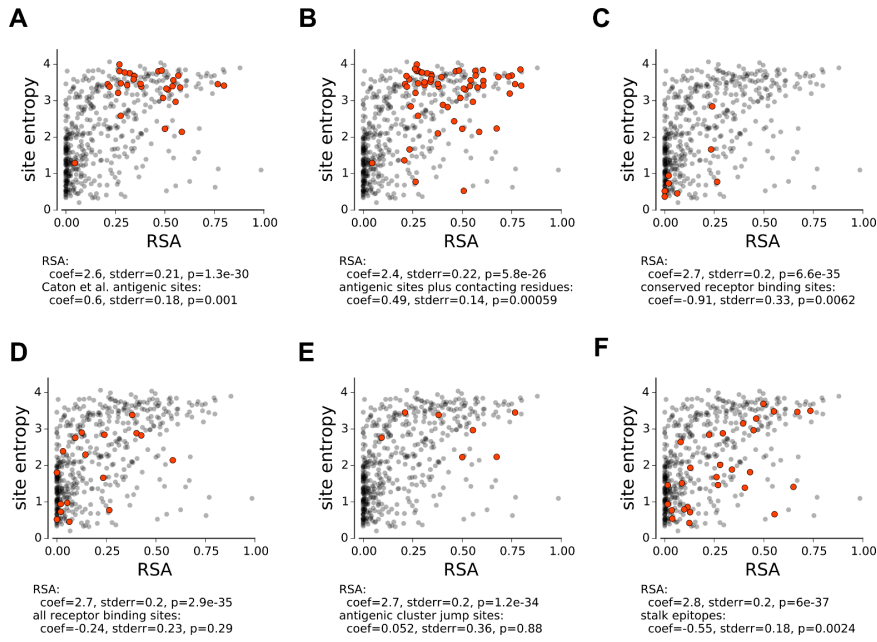

**Figure S6.** Statistical analyses of whether sets of sites have higher or lower mutational tolerance than expected given their solvent accessibility.

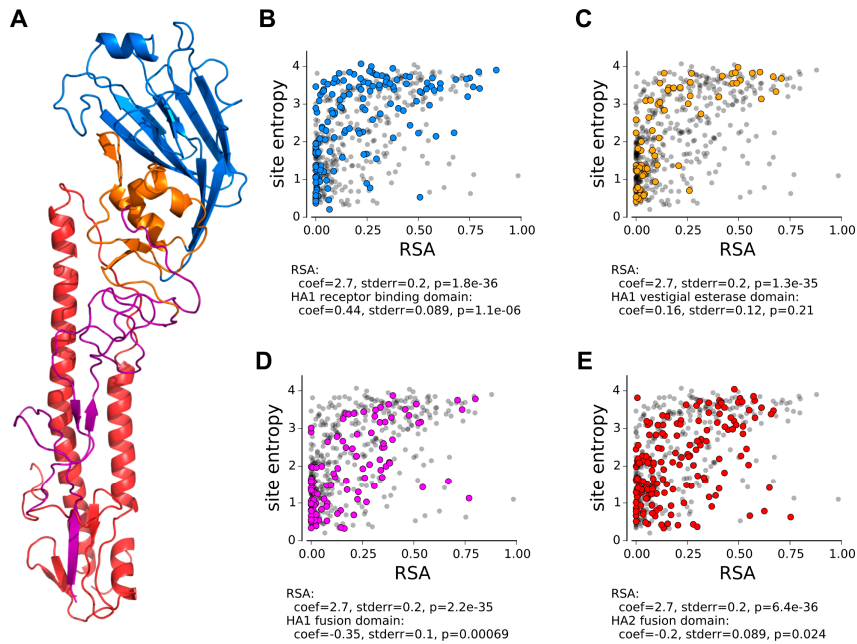

**Figure S7.** The mutational tolerance of HA's domains.

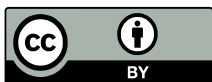

© 2016 by the authors, licensee MDPI, Basel, Switzerland. This article is an open access article distributed under the terms and conditions of the Creative Commons Attribution (CC-BY) license (<http://creativecommons.org/licenses/by/4.0/>).
